# Supplementary material for: Increased secretion of adipocyte-derived extracellular vesicles is associated with adipose tissue inflammation and the mobilization of excess lipid in human obesity
Source: Springer Nature journal article supplement (doi:10.1186/s12967-024-05249-w), 2024-07-04
Supplement: MOESM1 [file 12967_2024_5249_MOESM1_ESM.pdf]

**Supplementary Information, Additional file 1:**

**Table S1.** Quantitative real-time PCR primer sequences.

| Gene                                           |               | Primer sequences |                          |
|------------------------------------------------|---------------|------------------|--------------------------|
| C-C motif chemokine ligand 2                   | <i>CCL2</i>   | Forward 5'       | TCTCAAAGCTGAAGCTCGCAC    |
|                                                |               | Reverse 5'       | GCATTGATTGCATCTGGCTGA    |
| Interleukin-1 $\alpha$                         | <i>IL1A</i>   | Forward 5'       | CGCCAATGACTCAGAGGAAGA    |
|                                                |               | Reverse 5'       | AGGGCGTCATTGAGGATGAA     |
| Interleukin-1 $\beta$                          | <i>IL1B</i>   | Forward 5'       | TGGAGCAACAAGTGGTGT       |
|                                                |               | Reverse 5'       | TTGGGATCTACTCTCCAGC      |
| Interleukin-6                                  | <i>IL6</i>    | Forward 5'       | TGCAATAACCACCCCTGACC     |
|                                                |               | Reverse 5'       | GTGCCCATGCTACATTTGCC     |
| C-X-C motif chemokine ligand 8                 | <i>CXCL8</i>  | Forward 5'       | CAGTGGACCACACTGCGCCAA    |
|                                                |               | Reverse 5'       | TCCACAACCTCTGCACCCAGTT   |
| Hypoxanthine phosphoribosyltransferase 1       | <i>HPRT1</i>  | Forward 5'       | CCTGGCGTCGTGATTAGTG      |
|                                                |               | Reverse 5'       | ATCCAGCAGGTCAGCAAAGA     |
| Patatin like phospholipase domain containing 2 | <i>PNPLA2</i> | Forward 5'       | CCGATGTTTCTGGAGTGCTG     |
|                                                |               | Reverse 5'       | CACCAACAACACCGAGACC      |
| Toll like receptor 4                           | <i>TLR4</i>   | Forward 5'       | CAGAGTTGCTTTCAATGGCATC   |
|                                                |               | Reverse 5'       | AGACTGTAATCAAGAACCTGGAGG |
| Tumor necrosis factor                          | <i>TNF</i>    | Forward 5'       | CTGAAGTTCGGGGTGATCG      |
|                                                |               | Reverse 5'       | GCTTGGTGGTTTGCTACGAC     |
| Lipase A, lysosomal acid type                  | <i>LIPA</i>   | Forward 5'       | GAAAATGCGGTTCTTGGGGT     |
|                                                |               | Reverse 5'       | CAACTGGTTTGGGACCTTTGT    |

**Table S2.** Primary antibodies used in Western Blotting.

| Antibody              | Cat. Number | Company                   | Dilution |
|-----------------------|-------------|---------------------------|----------|
| Adiponectin           | sc-136131   | Santa Cruz                | 1:200    |
| Alix                  | 92880       | Cell Signaling Technology | 1:1000   |
| ApoA1                 | 3350S       | Cell Signaling Technology | 1:1000   |
| ApoCIII               | ab31528     | Abcam                     | 1:1000   |
| Mouse $\beta$ -actin  | A5441       | Sigma-Aldrich             | 1:1000   |
| Rabbit $\beta$ -actin | A2066       | Sigma-Aldrich             | 1:1000   |
| Calnexin              | 2433        | Cell Signaling Technology | 1:1000   |
| CD9                   | sc-59140    | Santa Cruz                | 1:1000   |
| CD63                  | ab59479     | Abcam                     | 1:1000   |
| FABP4                 | AF3150      | R&D systems               | 1:500    |
| Phospho-HSL (Ser660)  | 45804       | Cell Signaling Technology | 1:1000   |
| Rab7                  | 9367        | Cell Signaling Technology | 1:1000   |
| TSG101                | ab125011    | Abcam                     | 1:1000   |

**Table S3.** Characteristics of normal-weight subjects from which fasting plasma samples were obtained (mean  $\pm$  SEM).

|                                      |                |
|--------------------------------------|----------------|
| Gender (male/female)                 | 4/2            |
| Age                                  | 37 $\pm$ 5.4   |
| Body mass index (kg/m <sup>2</sup> ) | 23.7 $\pm$ 0.8 |

| FA           | Pre-SGBS cells (Mol-%) | Mature SGBS cells (Mol-%) | Pre-SGBS EVs (Mol-%) | Mature SGBS EVs (Mol-%) | P         |
|--------------|------------------------|---------------------------|----------------------|-------------------------|-----------|
| 12:0         | 0.974 ± 0.719ab        | 0.158 ± 0.010a            | 0.657 ± 0.287b       | 0.970 ± 0.226b          | 0.030     |
| 14:0         | 1.909 ± 0.290a         | 2.014 ± 0.099a            | 3.778 ± 0.120b       | 3.946 ± 0.672b          | 0.005     |
| 14:1n-9      | 0.142 ± 0.083ab        | 0.019 ± 0.006a            | 0.189 ± 0.071b       | 0.233 ± 0.064b          | 0.010     |
| 14:1n-7      | 0.129 ± 0.056          | 0.035 ± 0.005             | 0.180 ± 0.074        | 0.189 ± 0.077           | 0.060     |
| 14:1n-5      | 0.437 ± 0.309          | 0.663 ± 0.035*            | 0.719 ± 0.284        | 1.041 ± 0.433           | 0.074     |
| 15:0 iso     | 0.264 ± 0.121b         | 0.013 ± 0.002a*           | 0.174 ± 0.079b       | 0.247 ± 0.114b          | 0.001     |
| 15:0         | 0.697 ± 0.382b         | 0.071 ± 0.010a*           | 0.261 ± 0.039b       | 0.322 ± 0.038b          | 0.001     |
| 15:1n-6      | 0.523 ± 0.223b         | 0.054 ± 0.012a*           | 0.470 ± 0.335b       | 0.611 ± 0.372b          | 0.016     |
| 16:0 iso     | 0.114 ± 0.008b         | 0.017 ± 0.003a*           | 0.193 ± 0.097b       | 0.267 ± 0.110b          | 0.001     |
| DMA 16:0     | 1.151 ± 0.217          | 1.469 ± 0.305             | 0.521 ± 0.063        | 0.807 ± 0.286           | 0.298     |
| 16:0         | 18.539 ± 0.985a        | 27.959 ± 0.369b*          | 28.83 ± 0.700b       | 24.530 ± 3.701ab        | 0.005     |
| 16:1n-9      | 1.680 ± 0.296c         | 0.485 ± 0.027b*           | 0.182 ± 0.019a       | 0.343 ± 0.132ab         | 0.001     |
| 16:1n-7      | 2.401 ± 0.212a         | 21.296 ± 0.884b*          | 1.401 ± 0.049a       | 1.688 ± 0.067a*         | 0.000214  |
| 16:1n-5      | 0.373 ± 0.048b         | 0.049 ± 0.006a*           | 0.563 ± 0.113b       | 0.733 ± 0.285b          | 0.002     |
| 17:0 iso     | 0.395 ± 0.045b         | 0.051 ± 0.004a*           | 0.678 ± 0.253b       | 0.958 ± 0.231b          | 0.001     |
| 17:0 anteiso | 0.568 ± 0.060b         | 0.050 ± 0.008a*           | 0.407 ± 0.123b       | 0.478 ± 0.092b          | 0.001     |
| 17:0         | 1.089 ± 0.362b         | 0.081 ± 0.013a*           | 1.073 ± 0.664b       | 0.807 ± 0.212b          | 0.001     |
| 17:1n-8      | 1.113 ± 0.211b         | 0.157 ± 0.017a*           | 0.280 ± 0.174a       | 0.309 ± 0.073ab         | 0.007     |
| 18:0 iso     | 0.322 ± 0.110b         | 0.037 ± 0.008a*           | 0.719 ± 0.149b       | 1.591 ± 0.735b          | 0.001     |
| DMA 18:0     | 1.145 ± 0.267          | 0.560 ± 0.105             | 0.232 ± 0.061        | 0.356 ± 0.154           | 0.052     |
| DMA 18:1n-9  | 0.384 ± 0.056          | 0.254 ± 0.051             | 0.330 ± 0.168        | 0.893 ± 0.642           | 0.373     |
| DMA 18:1n-7  | 0.426 ± 0.076          | 0.623 ± 0.129             | 1.047 ± 0.342        | 0.787 ± 0.309           | 0.420     |
| 18:0         | 13.170 ± 1.520b        | 3.814 ± 0.321a*           | 18.493 ± 1.819b      | 13.843 ± 3.034b         | 0.001     |
| 18:1n-9      | 25.646 ± 2.540ab       | 29.663 ± 1.475b           | 21.912 ± 2.294a      | 20.497 ± 3.033a         | 0.021     |
| 18:1n-7      | 4.857 ± 0.634a         | 6.621 ± 0.302b*           | 2.592 ± 0.312a       | 2.337 ± 0.447a          | 0.001     |
| 18:1n-5      | 0.427 ± 0.089          | 0.507 ± 0.018*            | 0.438 ± 0.087        | 0.425 ± 0.100           | 0.160     |
| 18:2n-6      | 2.757 ± 0.422b         | 0.273 ± 0.055a*           | 1.182 ± 0.028b       | 1.262 ± 0.143b          | 0.000221  |
| 18:3n-6      | 0.100 ± 0.010ab        | 0.025 ± 0.015a*           | 0.329 ± 0.108b       | 0.222 ± 0.094b          | 0.002     |
| 19:0         | 0.175 ± 0.092b         | 0.016 ± 0.006a*           | 0.481 ± 0.251b       | 2.183 ± 1.166b          | 0.001     |
| 19:1n-10     | 0.171 ± 0.047b         | 0.024 ± 0.006a*           | 0.418 ± 0.162b       | 1.001 ± 0.567b          | 0.001     |
| 19:1n-8      | 0.174 ± 0.017b         | 0.037 ± 0.012a*           | 0.678 ± 0.385b       | 0.748 ± 0.396b          | 0.002     |
| 18:3n-3      | 0.167 ± 0.061b         | 0.020 ± 0.007a*           | 0.336 ± 0.130b       | 0.886 ± 0.409b          | 0.001     |
| 20:0         | 0.222 ± 0.027b         | 0.058 ± 0.004a*           | 0.164 ± 0.033b       | 0.178 ± 0.043b          | 0.001     |
| 20:1n-9      | 0.258 ± 0.038          | 0.236 ± 0.028             | 0.296 ± 0.102        | 1.428 ± 0.396b          | 0.866     |
| 20:1n-7      | 0.237 ± 0.054          | 0.165 ± 0.019             | 0.249 ± 0.100        | 0.321 ± 0.131           | 0.816     |
| 20:2n-9      | 0.370 ± 0.144          | 0.085 ± 0.009*            | 0.470 ± 0.429        | 0.478 ± 0.196           | 0.061     |
| 20:2n-6      | 0.092 ± 0.012b         | 0.021 ± 0.008a*           | 0.092 ± 0.061ab      | 0.074 ± 0.029ab         | 0.028     |
| 20:3n-9      | 0.296 ± 0.133a         | 0.652 ± 0.085b*           | 0.136 ± 0.037a       | 0.593 ± 0.462ab         | 0.022     |
| 20:3n-6      | 1.278 ± 0.131b         | 0.061 ± 0.012a*           | 0.444 ± 0.165ab      | 0.861 ± 0.367ab         | 0.003     |
| 20:4n-6      | 3.756 ± 0.657b         | 0.389 ± 0.057a*           | 0.370 ± 0.072a       | 0.464 ± 0.141a          | 0.004     |
| 20:3n-3      | 0.113 ± 0.085b         | 0.024 ± 0.018a*           | 0.034 ± 0.007b       | 0.040 ± 0.013b          | 0.038     |
| 20:4n-3      | 0.068 ± 0.023b         | 0.009 ± 0.002a*           | 0.034 ± 0.009b       | 0.058 ± 0.018b          | 0.008     |
| 20:5n-3      | 0.496 ± 0.097b         | 0.075 ± 0.015a*           | 0.667 ± 0.317b       | 0.311 ± 0.115b          | 0.003     |
| 22:0         | 0.295 ± 0.066b         | 0.076 ± 0.008a*           | 0.203 ± 0.094ab      | 0.150 ± 0.031ab         | 0.011     |
| 22:1n-9      | 0.056 ± 0.019ab        | 0.026 ± 0.006a            | 0.183 ± 0.110b       | 0.130 ± 0.048b          | 0.031     |
| 22:1n-7      | 0.024 ± 0.007          | 0.030 ± 0.005             | 0.062 ± 0.017        | 0.054 ± 0.025           | 0.308     |
| 22:2n-9      | 0.029 ± 0.008ab        | 0.013 ± 0.003a            | 0.052 ± 0.008b       | 0.035 ± 0.01ab          | 0.017     |
| 22:3n-9      | 0.544 ± 0.285ab        | 0.099 ± 0.036a            | 2.261 ± 0.760b       | 2.506 ± 1.837b          | 0.004     |
| 23:0         | 0.226 ± 0.149          | 0.218 ± 0.049             | 0.418 ± 0.338        | 0.131 ± 0.063           | 0.740     |
| 22:4n-6      | 0.811 ± 0.127b         | 0.098 ± 0.016a*           | 0.166 ± 0.129a       | 0.164 ± 0.113a          | 0.006     |
| 22:5n-6      | 0.147 ± 0.018b         | 0.015 ± 0.002a*           | 0.130 ± 0.047b       | 0.143 ± 0.060b          | 0.001     |
| 22:4n-3      | 0.034 ± 0.012b         | 0.005 ± 0.001a*           | 0.021 ± 0.005b       | 0.038 ± 0.020b          | 0.001     |
| 22:5n-3      | 2.047 ± 0.414b         | 0.138 ± 0.022a*           | 0.679 ± 0.132b       | 1.435 ± 0.711b          | 0.002     |
| 24:0         | 0.779 ± 0.143b         | 0.095 ± 0.010a*           | 0.109 ± 0.017a       | 0.195 ± 0.074ab         | 0.003     |
| 22:6n-3      | 4.926 ± 1.690b         | 0.125 ± 0.026a*           | 2.920 ± 2.165b       | 4.535 ± 2.740b          | 0.001     |
| 24:1n-9      | 0.410 ± 0.067b         | 0.164 ± 0.024a*           | 0.073 ± 0.010a       | 0.089 ± 0.032a          | 0.003     |
| 24:1n-7      | 0.063 ± 0.013b         | 0.011 ± 0.002a*           | 0.022 ± 0.005ab      | 0.077 ± 0.039b          | 0.007     |
| SUM SFA      | 39.740 ± 1.012b        | 34.726 ± 0.353a*          | 56.640 ± 0.796b      | 50.799 ± 4.748b         | 0.0000296 |
| SUM MUFA     | 39.122 ± 2.084a        | 60.242 ± 0.917b*          | 30.907 ± 1.890a      | 32.253 ± 2.069a         | 0.000244  |
| SUM PUFA     | 18.032 ± 1.975b        | 2.126 ± 0.236a*           | 10.322 ± 2.736b      | 14.105 ± 4.532b         | 0.001     |
| SUM n-6 PUFA | 8.942 ± 0.668b         | 0.882 ± 0.102a*           | 2.714 ± 0.229b       | 3.190 ± 0.575b          | 0.000221  |
| SUM n-3 PUFA | 7.851 ± 1.810b         | 0.396 ± 0.057a*           | 4.690 ± 2.227b       | 7.304 ± 3.494b          | 0.002     |
| UFA/SFA      | 1.447 ± 0.068a         | 1.799 ± 0.036b*           | 0.729 ± 0.028a       | 0.958 ± 0.165a          | 0.000262  |
| n-3/n-6 PUFA | 0.929 ± 0.280b         | 0.451 ± 0.050a*           | 1.610 ± 0.634b       | 1.952 ± 0.783b          | 0.011     |
| SUM DMA      | 3.106 ± 0.493          | 2.906 ± 0.585             | 2.131 ± 0.585        | 2.844 ± 1.089           | 0.825     |

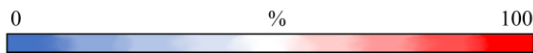

**Figure S1.** Fatty acid (FA) profiles of pre- and mature SGBS cells as well as of their extracellular vesicles (EVs). Detailed FAs were determined from total lipids with gas chromatography–mass spectrometry. Results are presented as mol-%, mean ± SEM. FAs are listed in the order of increasing chromatographic retention time. DMA = plasmalogen alkenyl chain-derived dimethyl acetal derivative, SFA = saturated fatty acid, MUFA = monounsaturated fatty acid, PUFA = polyunsaturated fatty acid, UFA = MUFA + PUFA. Means with no common letter are significantly different from each

other within a row (Kruskal–Wallis ANOVA). \*  $p \leq 0.05$  Mann–Whitney U test vs. premature cells or EVs. Results of EV samples were obtained from 3, and results of cell samples from 6 independently obtained samples.

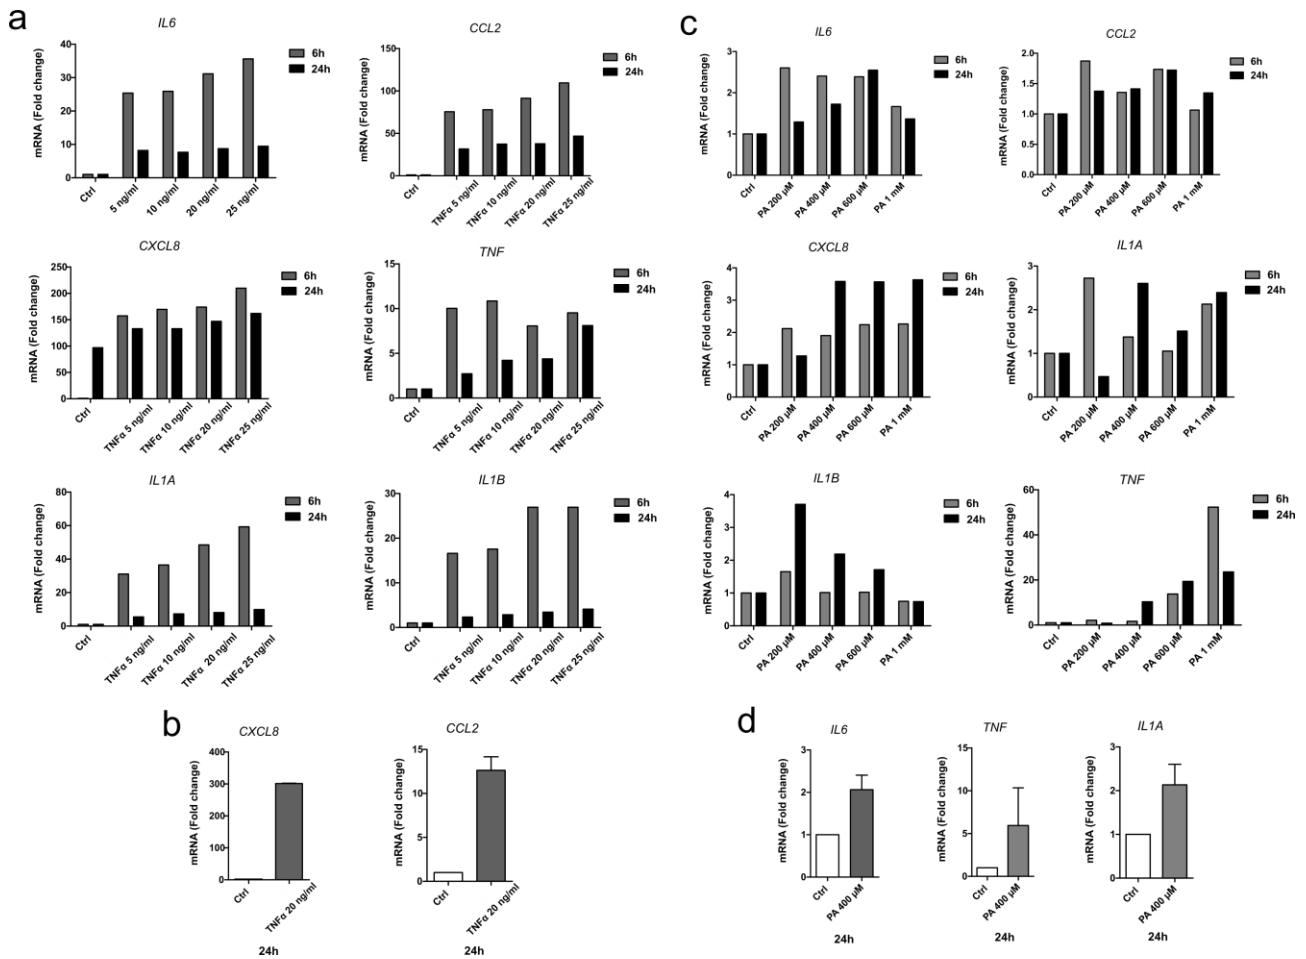

**Figure S2.** Responses of Simpson Golabi Behmel Syndrome (SGBS) cells to tumor necrosis factor  $\alpha$  (TNF $\alpha$ ) and palmitic acid (PA, 16:0) treatments. The mRNA expression levels of inflammation-related genes, including *IL6*, *CCL2*, *CXCL8*, *TNF*, *IL1A*, and *IL1B* after 6 h and 24 h TNF $\alpha$  treatments were analyzed by RT-qPCR (a). The values of one experiment are shown. Based on these results, final concentration of 20 ng/ml of TNF $\alpha$  was chosen and *CXCL8* and *CCL2* mRNA levels were further analyzed from two independent experiments (means + SEM) (b). The mRNA expression levels of inflammation-related genes, including *IL6*, *CCL2*, *CXCL8*, *IL1A*, *IL1B*, and *TNF* after 6 h and 24 h PA treatments were analyzed from one experiment (c). Based on these results, final concentration of 400  $\mu$ M of PA was chosen and *IL6*, *TNF*, and *IL1A* mRNA levels were further analyzed from two independent experiments (means + SEM) (d).

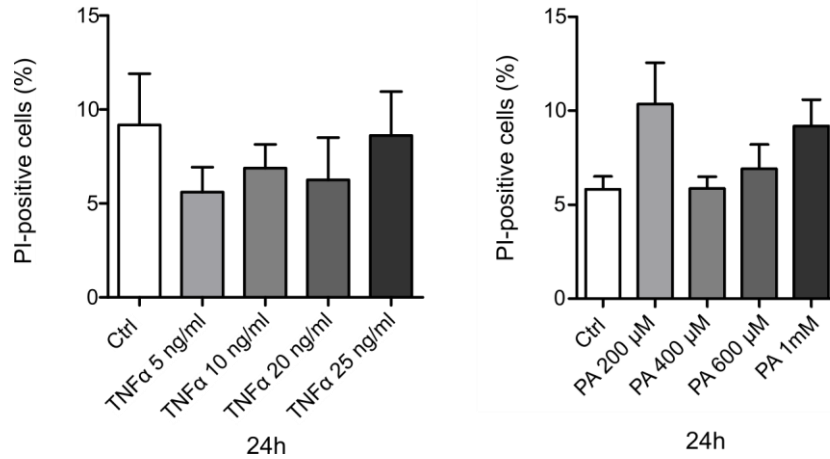

**Figure S3.** Viability and responses of Simpson Golabi Behmel Syndrome (SGBS) cells to tumor necrosis factor  $\alpha$  (TNF $\alpha$ ) and palmitic acid (PA, 16:0) treatments. SGBS cells were treated with different concentrations of TNF $\alpha$  and PA for 24h, and cell viability was evaluated by propidium iodide (PI) staining and confocal microscopy. PI-positive cells were manually counted from one experiment, from 10 images per each sample group. Results are presented as mean % of PI-positive cells from total cell count + SEM.

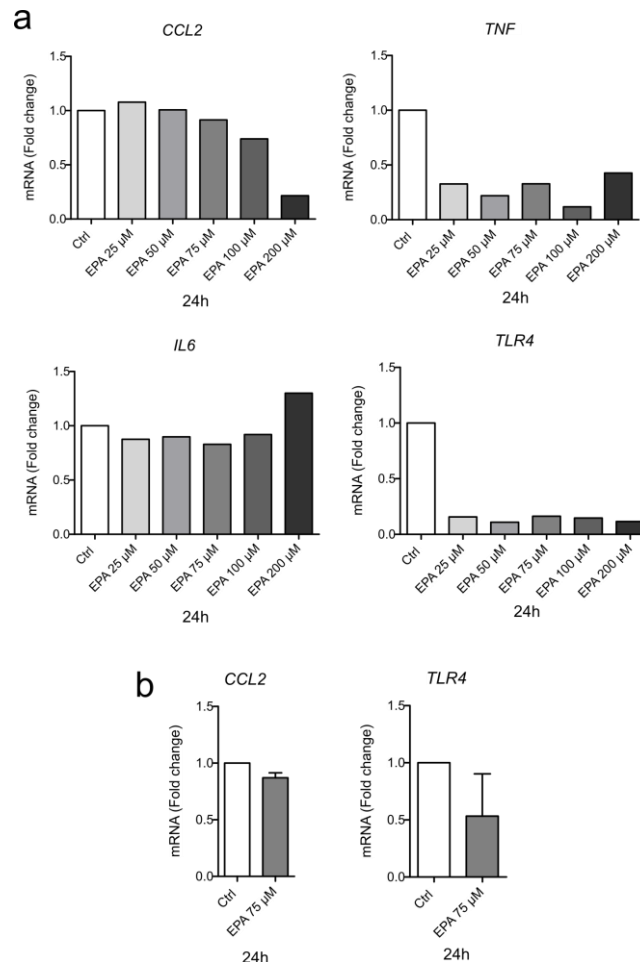

**Figure S4.** Responses of Simpson Golabi Behmel Syndrome (SGBS) cells to 24-h eicosapentaenoic acid (EPA, 20:5n-3) treatments. The mRNA expression levels of inflammation-related genes, including *CCL2*, *TNF*, *IL6*, and *TLR4* were analyzed by RT-qPCR from one experiment (a). Based on these results, final concentration of 75 μM of EPA was chosen, and *CCL2* and *TLR4* mRNA levels were further analyzed from two independent experiments (b). The means + SEM are shown.



| FA           | SGBS ctrl cells (Mol-%) | TNF $\alpha$ cells (Mol-%) | TNF $\alpha$ ctrl EVs (Mol-%) | TNF $\alpha$ EVs (Mol-%) | P     | FA           | Ctrl cells (Mol-%) | PA cells (Mol-%) | Ctrl EVs (Mol-%) | PA EVs (Mol-%)   | P     | FA           | Ctrl cells (Mol-%) | EPA cells (Mol-%) | Ctrl EVs (Mol-%) | EPA EVs (Mol-%)  | P     |
|--------------|-------------------------|----------------------------|-------------------------------|--------------------------|-------|--------------|--------------------|------------------|------------------|------------------|-------|--------------|--------------------|-------------------|------------------|------------------|-------|
| 12:0         | 0.220 ± 0.036           | 0.302 ± 0.068              | 0.744 ± 0.301                 | 0.562 ± 0.151            | 0.241 | 12:0         | 0.259 ± 0.050a     | 0.218 ± 0.021a   | 0.507 ± 0.064ab  | 1.130 ± 0.43b*   | 0.011 | 12:0         | 0.209 ± 0.030a     | 0.233 ± 0.020a    | 1.110 ± 0.131b   | 1.722 ± 0.865b   | 0.008 |
| 14:0         | 2.645 ± 0.261a          | 2.857 ± 0.124ab            | 4.250 ± 0.805bc               | 4.809 ± 0.804c           | 0.035 | 14:0         | 3.103 ± 0.330a     | 2.877 ± 0.229a   | 5.111 ± 0.549b   | 4.181 ± 0.363ab* | 0.130 | 14:0         | 2.879 ± 0.273a     | 3.021 ± 0.201a    | 6.044 ± 0.682b   | 3.783 ± 0.363ab* | 0.020 |
| 14:1n-9      | 0.014 ± 0.003a          | 0.012 ± 0.004a             | 0.312 ± 0.103b                | 0.111 ± 0.057ab          | 0.014 | 14:1n-9      | 0.012 ± 0.003a     | 0.011 ± 0.001a   | 0.237 ± 0.037b   | 0.187 ± 0.024b   | 0.008 | 14:1n-9      | 0.018 ± 0.005a     | 0.014 ± 0.008a    | 0.460 ± 0.23b    | 0.286 ± 0.163b   | 0.006 |
| 14:1n-7      | 0.037 ± 0.004           | 0.044 ± 0.007              | 0.175 ± 0.077                 | 0.159 ± 0.118            | 0.079 | 14:1n-7      | 0.074 ± 0.023ab    | 0.036 ± 0.004a   | 0.229 ± 0.070b   | 0.227 ± 0.083b   | 0.016 | 14:1n-7      | 0.035 ± 0.004a     | 0.028 ± 0.003a    | 0.623 ± 0.344b   | 0.767 ± 0.424b   | 0.008 |
| 14:1n-5      | 1.323 ± 0.185           | 1.569 ± 0.189              | 1.526 ± 0.615                 | 0.748 ± 0.313            | 0.350 | 14:1n-5      | 1.645 ± 0.300c     | 1.182 ± 0.144bc  | 0.643 ± 0.092a   | 0.662 ± 0.166ab  | 0.019 | 14:1n-5      | 1.213 ± 0.142      | 1.060 ± 0.269     | 0.640 ± 0.157    | 0.561 ± 0.202    | 0.119 |
| 15:0 iso     | 0.028 ± 0.008a          | 0.035 ± 0.015a             | 0.200 ± 0.088b                | 0.151 ± 0.065b           | 0.017 | 15:0 iso     | 0.043 ± 0.016ab    | 0.015 ± 0.002a   | 0.440 ± 0.271c   | 0.111 ± 0.019bc  | 0.008 | 15:0 iso     | 0.017 ± 0.003a     | 0.023 ± 0.020ab   | 0.537 ± 0.330b   | 0.949 ± 0.495b   | 0.024 |
| 15:0         | 0.090 ± 0.005a          | 0.115 ± 0.027a             | 0.359 ± 0.064b                | 0.293 ± 0.027b           | 0.009 | 15:0         | 0.101 ± 0.012a     | 0.098 ± 0.022a   | 0.355 ± 0.083b   | 0.252 ± 0.097b   | 0.008 | 15:0         | 0.095 ± 0.018a     | 0.103 ± 0.017a    | 0.416 ± 0.091b   | 0.624 ± 0.208b   | 0.008 |
| 15:1n-6      | 0.022 ± 0.006a          | 0.025 ± 0.008a             | 0.625 ± 0.261b                | 0.397 ± 0.125b           | 0.009 | 15:1n-6      | 0.050 ± 0.015a     | 0.028 ± 0.006a   | 0.557 ± 0.230b   | 0.282 ± 0.067b   | 0.008 | 15:1n-6      | 0.012 ± 0.002a     | 0.029 ± 0.011ab   | 0.830 ± 0.327bc  | 4.504 ± 2.834c   | 0.005 |
| 16:0 iso     | 0.020 ± 0.005a          | 0.016 ± 0.004a             | 0.397 ± 0.169b                | 0.215 ± 0.042b           | 0.009 | 16:0 iso     | 0.020 ± 0.005a     | 0.014 ± 0.001a   | 0.327 ± 0.089b   | 0.293 ± 0.026b   | 0.008 | 16:0 iso     | 0.019 ± 0.003a     | 0.019 ± 0.003a    | 0.726 ± 0.354b   | 0.743 ± 0.325b   | 0.008 |
| DMA 16:0     | 0.315 ± 0.071           | 0.207 ± 0.014              | 0.487 ± 0.155                 | 0.614 ± 0.226            | 0.162 | DMA 16:0     | 0.195 ± 0.016a     | 0.350 ± 0.129ab  | 0.559 ± 0.267b   | 0.608 ± 0.185b   | 0.045 | DMA 16:0     | 0.256 ± 0.031      | 0.291 ± 0.038     | 0.753 ± 0.247    | 0.478 ± 0.124    | 0.161 |
| 16:0         | 27.237 ± 0.419          | 26.802 ± 0.623             | 27.905 ± 1.589                | 29.317 ± 4.166           | 0.633 | 16:0         | 26.293 ± 0.88a     | 1.055 ± 0.538b   | 28.551 ± 1.852ab | 27.636 ± 2.242ab | 0.035 | 16:0         | 27.881 ± 0.459     | 28.074 ± 0.351    | 31.165 ± 4.660   | 30.959 ± 2.003   | 0.535 |
| 16:1n-9      | 0.407 ± 0.033b          | 0.479 ± 0.103b             | 0.275 ± 0.041ab               | 0.144 ± 0.025ab          | 0.022 | 16:1n-9      | 0.746 ± 0.189b     | 0.872 ± 0.364b   | 0.264 ± 0.098ab  | 0.115 ± 0.012a   | 0.016 | 16:1n-9      | 0.577 ± 0.105      | 0.391 ± 0.052     | 0.379 ± 0.186    | 0.237 ± 0.060    | 0.142 |
| 16:1n-7      | 33.648 ± 1.915b         | 34.392 ± 1.170b            | 2.019 ± 0.546a                | 1.562 ± 0.060a           | 0.010 | 16:1n-7      | 35.551 ± 2.763b    | 30.958 ± 1.823b  | 1.378 ± 0.168a   | 1.255 ± 0.481a   | 0.006 | 16:1n-7      | 31.292 ± 1.699bc   | 32.465 ± 0.732c   | 2.395 ± 0.891ab  | 1.098 ± 0.203a   | 0.007 |
| 16:1n-5      | 0.055 ± 0.009a          | 0.064 ± 0.015a             | 0.896 ± 0.099b                | 0.707 ± 0.300b           | 0.013 | 16:1n-5      | 0.039 ± 0.003a     | 0.047 ± 0.005ab  | 0.561 ± 0.065c   | 0.453 ± 0.084bc  | 0.006 | 16:1n-5      | 0.055 ± 0.017a     | 0.057 ± 0.010a    | 0.951 ± 0.231b   | 0.535 ± 0.200b   | 0.007 |
| 17:0 iso     | 0.059 ± 0.010a          | 0.062 ± 0.006a             | 0.608 ± 0.219b                | 0.410 ± 0.096b           | 0.010 | 17:0 iso     | 0.061 ± 0.008      | 0.052 ± 0.007    | 0.768 ± 0.420    | 0.861 ± 0.410    | 0.051 | 17:0 iso     | 0.042 ± 0.006a     | 0.057 ± 0.015a    | 0.398 ± 0.186ab  | 0.714 ± 0.135b   | 0.040 |
| 17:0 anteiso | 0.031 ± 0.003ab         | 0.025 ± 0.003a             | 0.360 ± 0.068c                | 0.322 ± 0.040bc          | 0.006 | 17:0 anteiso | 0.042 ± 0.011a     | 0.034 ± 0.004a   | 0.356 ± 0.044b   | 0.425 ± 0.196b   | 0.008 | 17:0 anteiso | 0.031 ± 0.006a     | 0.030 ± 0.006a    | 0.523 ± 0.128b   | 0.443 ± 0.076b   | 0.008 |
| 17:0         | 0.051 ± 0.005a          | 0.120 ± 0.070a             | 2.101 ± 1.080b                | 1.201 ± 0.277b           | 0.013 | 17:0         | 0.043 ± 0.006a     | 0.048 ± 0.006a   | 1.503 ± 1.388b   | 1.825 ± 1.366b   | 0.008 | 17:0         | 0.063 ± 0.012a     | 0.068 ± 0.012a    | 1.348 ± 0.388b   | 2.977 ± 2.154b   | 0.009 |
| 17:1n-8      | 0.170 ± 0.013           | 0.163 ± 0.012              | 0.200 ± 0.034                 | 0.161 ± 0.013            | 0.702 | 17:1n-8      | 0.191 ± 0.022      | 0.159 ± 0.012    | 0.184 ± 0.039b   | 0.658 ± 0.441    | 0.173 | 17:1n-8      | 0.192 ± 0.034      | 0.198 ± 0.030     | 0.521 ± 0.256    | 0.812 ± 0.364    | 0.406 |
| 18:0 iso     | 0.033 ± 0.007a          | 0.025 ± 0.004a             | 1.397 ± 0.672b                | 0.820 ± 0.223b           | 0.009 | 18:0 iso     | 0.035 ± 0.007a     | 0.022 ± 0.004a   | 0.938 ± 0.542b   | 1.269 ± 0.065b   | 0.006 | 18:0 iso     | 0.038 ± 0.012      | 0.031 ± 0.006a    | 1.255 ± 0.464b   | 0.726 ± 0.202b   | 0.008 |
| DMA 18:0     | 0.097 ± 0.017           | 0.083 ± 0.009              | 0.278 ± 0.093                 | 0.218 ± 0.085            | 0.131 | DMA 18:0     | 0.066 ± 0.009      | 0.127 ± 0.054    | 0.227 ± 0.040    | 0.242 ± 0.100    | 0.132 | DMA 18:0     | 0.093 ± 0.011      | 0.115 ± 0.016     | 0.339 ± 0.121    | 0.415 ± 0.186    | 0.071 |
| DMA 18:1n-9  | 0.054 ± 0.007ab         | 0.043 ± 0.005a             | 0.306 ± 0.080b                | 0.225 ± 0.124b           | 0.025 | DMA 18:1n-9  | 0.037 ± 0.002a     | 0.063 ± 0.021ab  | 0.192 ± 0.064bc  | 0.383 ± 0.045c   | 0.008 | DMA 18:1n-9  | 0.063 ± 0.007a     | 0.058 ± 0.009a    | 1.041 ± 0.584b   | 0.584 ± 0.244ab  | 0.047 |
| DMA 18:1n-7  | 0.119 ± 0.021ab         | 0.083 ± 0.006a             | 1.420 ± 0.596bc               | 1.150 ± 0.418bc          | 0.006 | DMA 18:1n-7  | 0.084 ± 0.007a     | 0.128 ± 0.046ab  | 1.118 ± 0.643c   | 1.961 ± 0.643c   | 0.012 | DMA 18:1n-7  | 0.096 ± 0.014a     | 0.114 ± 0.015a    | 0.820 ± 0.290b   | 0.792 ± 0.195b   | 0.007 |
| 18:0         | 1.502 ± 0.162a          | 1.447 ± 0.186a             | 16.247 ± 2.450b               | 17.256 ± 2.738b          | 0.010 | 18:0         | 1.215 ± 0.212a     | 1.827 ± 0.345ab  | 19.535 ± 1.481c  | 24.244 ± 8.197bc | 0.002 | 18:0         | 1.846 ± 0.249a     | 1.784 ± 0.189ab   | 12.902 ± 2.655bc | 19.977 ± 2.704c  | 0.007 |
| 18:1n-9      | 20.535 ± 2.136          | 19.911 ± 1.289             | 20.308 ± 2.454                | 21.232 ± 2.343           | 0.960 | 18:1n-9      | 19.130 ± 2.537     | 18.801 ± 2.105   | 20.619 ± 1.471c  | 16.793 ± 6.043c  | 0.892 | 18:1n-9      | 21.050 ± 2.665     | 19.511 ± 1.735    | 13.915 ± 5.069   | 12.054 ± 6.321   | 0.552 |
| 18:1n-7      | 8.257 ± 0.377b          | 8.096 ± 0.428b             | 2.949 ± 0.262a                | 2.708 ± 0.213a           | 0.009 | 18:1n-7      | 7.984 ± 0.262bc    | 8.595 ± 0.452c   | 3.457 ± 0.778ab  | 1.453 ± 0.038a*  | 0.005 | 18:1n-7      | 8.966 ± 0.568c     | 8.383 ± 0.591bc   | 2.517 ± 0.529ab  | 1.802 ± 0.589a   | 0.008 |
| 18:1n-5      | 0.518 ± 0.048           | 0.374 ± 0.100              | 0.579 ± 0.192                 | 0.470 ± 0.192            | 0.470 | 18:1n-5      | 0.871 ± 0.275      | 0.507 ± 0.032*   | 0.443 ± 0.060    | 0.439 ± 0.151    | 0.104 | 18:1n-5      | 0.590 ± 0.066      | 0.521 ± 0.039     | 0.355 ± 0.213    | 0.357 ± 0.096    | 0.358 |
| 18:2n-6      | 0.551 ± 0.021a          | 0.575 ± 0.017a             | 1.267 ± 0.133b                | 1.112 ± 0.229b           | 0.009 | 18:2n-6      | 0.106 ± 0.011      | 0.109 ± 0.012    | 1.440 ± 0.120    | 0.873 ± 0.410    | 0.072 | 18:2n-6      | 0.120 ± 0.023a     | 0.115 ± 0.018a    | 0.919 ± 0.089b   | 0.792 ± 0.316b   | 0.034 |
| 18:3n-6      | 0.005 ± 0.001a          | 0.005 ± 0.001a             | 0.854 ± 0.487c                | 0.544 ± 0.344bc          | 0.004 | 18:3n-6      | 0.012 ± 0.001a     | 0.010 ± 0.001a   | 0.247 ± 0.089b   | 0.457 ± 0.055b   | 0.007 | 18:3n-6      | 0.007 ± 0.002a     | 0.007 ± 0.002a    | 0.302 ± 0.163b   | 0.299 ± 0.105b   | 0.007 |
| 19:0         | 0.016 ± 0.003ab         | 0.008 ± 0.003a             | 0.544 ± 0.487c                | 0.544 ± 0.344bc          | 0.004 | 19:0         | 0.006 ± 0.001a     | 0.009 ± 0.002ab  | 0.264 ± 0.151c   | 0.274 ± 0.151bc  | 0.005 | 19:0         | 0.012 ± 0.005ab    | 0.01 ± 0.005a     | 0.875 ± 0.593c   | 0.149 ± 0.053bc  | 0.010 |
| 19:1n-10     | 0.022 ± 0.005ab         | 0.014 ± 0.004a             | 0.388 ± 0.124bc               | 0.551 ± 0.233c           | 0.006 | 19:1n-10     | 0.015 ± 0.004a     | 0.018 ± 0.007a   | 0.430 ± 0.085b   | 0.673 ± 0.182b   | 0.008 | 19:1n-10     | 0.026 ± 0.009a     | 0.026 ± 0.005a    | 1.226 ± 0.708b   | 0.480 ± 0.115b   | 0.007 |
| 19:1n-8      | 0.024 ± 0.005a          | 0.028 ± 0.008a             | 0.502 ± 0.234b                | 0.928 ± 0.781b           | 0.012 | 19:1n-8      | 0.028 ± 0.003a     | 0.032 ± 0.010a   | 0.278 ± 0.030b   | 0.703 ± 0.471b   | 0.008 | 19:1n-8      | 0.040 ± 0.013a     | 0.041 ± 0.014a    | 1.152 ± 0.844b   | 0.344 ± 0.097b   | 0.016 |
| 18:3n-3      | 0.019 ± 0.004ab         | 0.011 ± 0.003a             | 0.343 ± 0.091bc               | 0.621 ± 0.369c           | 0.006 | 18:3n-3      | 0.010 ± 0.003a     | 0.010 ± 0.003a   | 1.287 ± 0.657b   | 0.510 ± 0.255b   | 0.007 | 18:3n-3      | 0.012 ± 0.004a     | 0.015 ± 0.003a    | 0.727 ± 0.283b   | 0.877 ± 0.415b   | 0.008 |
| 20:0         | 0.049 ± 0.008ab         | 0.042 ± 0.005a             | 0.136 ± 0.044bc               | 0.278 ± 0.178b           | 0.009 | 20:0         | 0.034 ± 0.002a     | 0.043 ± 0.007a   | 0.178 ± 0.013b   | 0.355 ± 0.183b   | 0.007 | 20:0         | 0.051 ± 0.006ab    | 0.032 ± 0.005a*   | 0.279 ± 0.030b   | 0.281 ± 0.044b   | 0.004 |
| 20:1n-9      | 0.163 ± 0.020           | 0.166 ± 0.016              | 0.834 ± 0.383                 | 1.357 ± 1.215            | 0.137 | 20:1n-9      | 0.153 ± 0.014a     | 0.181 ± 0.016ab  | 0.287 ± 0.030b   | 0.960 ± 0.722ab  | 0.042 | 20:1n-9      | 0.198 ± 0.029a     | 0.189 ± 0.024a    | 0.634 ± 0.133b   | 0.348 ± 0.102ab  | 0.030 |
| 20:1n-7      | 0.149 ± 0.011           | 0.148 ± 0.015              | 0.279 ± 0.031                 | 0.349 ± 0.227            | 0.142 | 20:1n-7      | 0.117 ± 0.011a     | 0.146 ± 0.013    | 0.381 ± 0.291    | 0.350 ± 0.21     | 0.502 | 20:1n-7      | 0.165 ± 0.026      | 0.162 ± 0.023     | 0.643 ± 0.269    | 0.300 ± 0.121    | 0.630 |
| 20:2n-9      | 0.054 ± 0.008           | 0.046 ± 0.007              | 0.340 ± 0.256                 | 0.669 ± 0.635            | 0.303 | 20:2n-9      | 0.058 ± 0.008a     | 0.055 ± 0.009a   | 0.173 ± 0.077b   | 0.943 ± 0.658b   | 0.017 | 20:2n-9      | 0.072 ± 0.006a     | 0.065 ± 0.011a    | 0.700 ± 0.299b   | 0.382 ± 0.154ab  | 0.046 |
| 20:2n-6      | 0.010 ± 0.003ab         | 0.005 ± 0.001a             | 0.051 ± 0.009c                | 0.055 ± 0.029bc          | 0.012 | 20:2n-6      | 0.014 ± 0.002ab    | 0.006 ± 0.001a   | 0.103 ± 0.048bc  | 0.173 ± 0.085c   | 0.004 | 20:2n-6      | 0.008 ± 0.001a     | 0.009 ± 0.003a    | 0.109 ± 0.055b   | 0.099 ± 0.021b   | 0.016 |
| 20:3n-9      | 0.395 ± 0.036           | 0.395 ± 0.046              | 0.440 ± 0.036                 | 1.267 ± 0.610            | 0.631 | 20:3n-9      | 0.323 ± 0.038      | 0.343 ± 0.079    | 1.266 ± 1.173    | 1.540 ± 1.313    | 0.844 | 20:3n-9      | 0.339 ± 0.022      | 0.245 ± 0.067     | 0.746 ± 0.281    | 0.225 ± 0.083    | 0.569 |
| 20:3n-6      | 0.023 ± 0.003a          | 0.025 ± 0.003a             | 0.430 ± 0.066                 | 0.375 ± 0.251            | 0.214 | 20:3n-6      | 0.025 ± 0.004a     | 0.026 ± 0.005a   | 0.308 ± 0.075b   | 0.252 ± 0.137b   | 0.011 | 20:3n-6      | 0.025 ± 0.006a     | 0.030 ± 0.005ab   | 0.789 ± 0.287c   | 0.466 ± 0.229bc  | 0.005 |
| 20:4n-6      | 0.231 ± 0.030           | 0.203 ± 0.032              | 0.430 ± 0.066                 | 0.375 ± 0.251            | 0.214 | 20:4n-6      | 0.226 ± 0.030      | 0.247 ± 0.048    | 0.269 ± 0.075b   | 0.330 ± 0.049    | 0.291 | 20:4n-6      | 0.273 ± 0.062      | 0.264 ± 0.071     | 0.396 ± 0.148    | 0.511 ± 0.199    | 0.651 |
| 20:3n-3      | 0.006 ± 0.002ab         |                            |                               |                          |       |              |                    |                  |                  |                  |       |              |                    |                   |                  |                  |       |

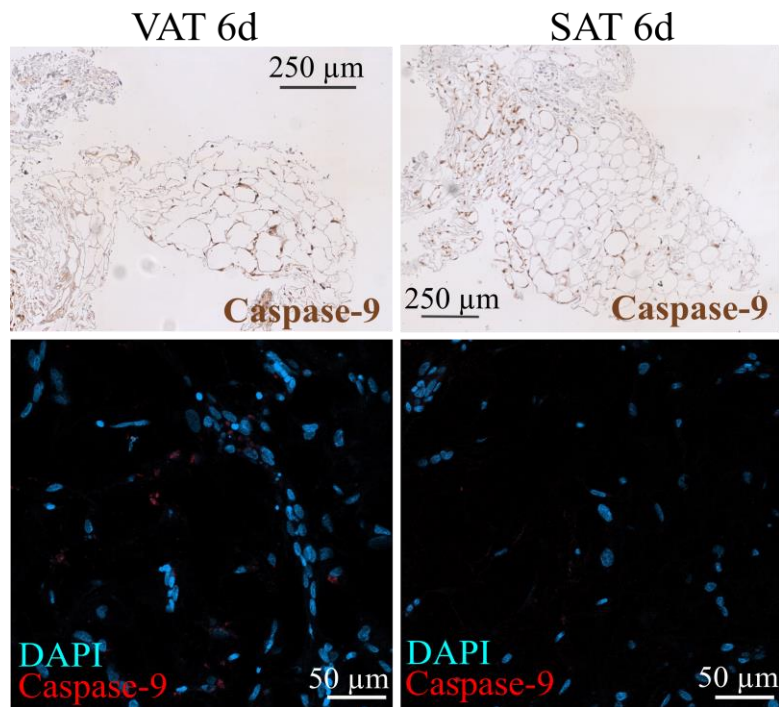

**Figure S6.** Caspase-9 staining of patient adipose tissue (AT) samples. AT samples from bariatric surgeries were cultured *ex vivo* in extracellular vesicle (EV)-free culture medium for several days, after which EVs were isolated by differential steps of ultracentrifugation. After 6 days of culture initiation, paraffin sections of both visceral (VAT) and subcutaneous (SAT) ATs were obtained and stained both immunohistochemically and fluorescently for caspase-9, in order to confirm that no major degree of apoptosis is present in AT cultures.



| FA           | VAT <i>ex vivo</i> medium (Mol-%) | SAT <i>ex vivo</i> medium (Mol-%) | VAT EVs (Mol-%)  | SAT EVs (Mol-%) | P     |
|--------------|-----------------------------------|-----------------------------------|------------------|-----------------|-------|
| 12:0         | 1.311 ± 0.394                     | 2.720 ± 0.762                     | 1.012 ± 0.465    | 2.078 ± 1.110   | 0.415 |
| 14:0         | 4.303 ± 0.321                     | 3.442 ± 0.317                     | 3.805 ± 0.684    | 2.601 ± 0.359   | 0.078 |
| 14:1n-9      | 0.269 ± 0.062                     | 0.185 ± 0.045                     | 0.255 ± 0.122    | 0.216 ± 0.057   | 0.849 |
| 14:1n-7      | 0.190 ± 0.043                     | 0.194 ± 0.046                     | 0.455 ± 0.334    | 0.776 ± 0.384   | 0.711 |
| 14:1n-5      | 0.535 ± 0.059                     | 0.697 ± 0.121                     | 0.595 ± 0.268    | 0.765 ± 0.120   | 0.442 |
| 15:0 iso     | 0.176 ± 0.030                     | 0.305 ± 0.087                     | 0.460 ± 0.359    | 0.981 ± 0.503   | 0.258 |
| 15:0         | 0.343 ± 0.053                     | 0.354 ± 0.024                     | 0.333 ± 0.141    | 0.254 ± 0.082   | 0.527 |
| 15:1n-6      | 0.326 ± 0.059                     | 0.319 ± 0.064                     | 0.751 ± 0.446    | 1.358 ± 0.401   | 0.072 |
| 16:0 iso     | 0.180 ± 0.025                     | 0.244 ± 0.045                     | 0.234 ± 0.109    | 0.334 ± 0.095   | 0.447 |
| DMA 16:0     | 0.711 ± 0.075                     | 0.687 ± 0.130                     | 0.688 ± 0.138    | 1.108 ± 0.198   | 0.298 |
| 16:0         | 28.100 ± 1.202                    | 24.230 ± 2.185                    | 25.333 ± 4.289   | 24.200 ± 2.105  | 0.357 |
| 16:1n-9      | 0.333 ± 0.057                     | 0.492 ± 0.085                     | 0.269 ± 0.044    | 0.204 ± 0.086   | 0.154 |
| 16:1n-7      | 1.860 ± 0.116                     | 2.095 ± 0.337                     | 1.481 ± 0.409    | 1.525 ± 0.570   | 0.687 |
| 16:1n-5      | 0.434 ± 0.058                     | 0.297 ± 0.047                     | 0.431 ± 0.238    | 0.621 ± 0.219   | 0.321 |
| 17:0 iso     | 1.110 ± 0.132                     | 0.721 ± 0.154                     | 0.811 ± 0.248    | 1.063 ± 0.273   | 0.209 |
| 17:0 anteiso | 0.399 ± 0.036                     | 0.452 ± 0.031                     | 0.282 ± 0.012    | 0.562 ± 0.209   | 0.137 |
| 17:0         | 0.624 ± 0.046                     | 1.440 ± 0.455*                    | 1.197 ± 0.883    | 1.072 ± 0.589   | 0.154 |
| 17:1n-8      | 0.236 ± 0.028                     | 0.269 ± 0.043                     | 0.284 ± 0.132    | 0.242 ± 0.044   | 0.964 |
| 18:0 iso     | 0.943 ± 0.145                     | 0.924 ± 0.225                     | 1.098 ± 0.476    | 1.890 ± 0.399   | 0.289 |
| DMA 18:0     | 0.341 ± 0.050                     | 0.309 ± 0.080                     | 0.438 ± 0.166    | 0.412 ± 0.189   | 0.737 |
| DMA 18:1n-9  | 0.888 ± 0.215                     | 0.676 ± 0.198                     | 1.158 ± 0.853    | 1.898 ± 0.903   | 0.391 |
| DMA 18:1n-7  | 1.241 ± 0.205                     | 0.913 ± 0.339                     | 1.126 ± 0.528    | 1.598 ± 0.687   | 0.675 |
| 18:0         | 15.560 ± 1.189                    | 14.047 ± 1.744                    | 15.636 ± 1.519   | 17.878 ± 1.911  | 0.593 |
| 18:1n-9      | 23.872 ± 0.652b                   | 21.593 ± 1.087ab                  | 18.659 ± 4.619ab | 13.976 ± 2.147a | 0.037 |
| 18:1n-7      | 3.179 ± 0.123b                    | 3.080 ± 0.247b                    | 2.363 ± 0.301ab  | 1.018 ± 0.435a* | 0.022 |
| 18:1n-5      | 0.429 ± 0.045                     | 0.360 ± 0.050                     | 0.326 ± 0.070    | 0.202 ± 0.027   | 0.088 |
| 18:2n-6      | 2.445 ± 0.330b                    | 2.875 ± 0.539b                    | 1.310 ± 0.479ab  | 1.002 ± 0.212a  | 0.033 |
| 18:3n-6      | 0.265 ± 0.065                     | 0.913 ± 0.469                     | 0.301 ± 0.134    | 0.970 ± 0.419   | 0.509 |
| 19:0         | 1.235 ± 0.395                     | 1.353 ± 0.491                     | 1.344 ± 0.767    | 0.600 ± 0.114   | 0.795 |
| 19:1n-10     | 0.479 ± 0.030                     | 0.695 ± 0.179                     | 1.210 ± 0.946    | 1.030 ± 0.147   | 0.169 |
| 19:1n-8      | 0.176 ± 0.018                     | 0.657 ± 0.312                     | 0.344 ± 0.151    | 0.841 ± 0.160*  | 0.060 |
| 18:3n-3      | 0.220 ± 0.028                     | 0.400 ± 0.093                     | 0.730 ± 0.291    | 0.697 ± 0.202   | 0.079 |
| 20:0         | 0.226 ± 0.015                     | 0.168 ± 0.028                     | 0.139 ± 0.040    | 0.174 ± 0.071   | 0.267 |
| 20:1n-9      | 0.270 ± 0.032                     | 0.884 ± 0.482                     | 1.862 ± 1.642    | 0.554 ± 0.364   | 0.994 |
| 20:1n-7      | 0.119 ± 0.021                     | 0.312 ± 0.186                     | 0.735 ± 0.587    | 0.228 ± 0.035   | 0.210 |
| 20:2n-9      | 0.146 ± 0.070                     | 0.401 ± 0.183                     | 0.456 ± 0.326    | 0.153 ± 0.031   | 0.507 |
| 20:2n-6      | 0.173 ± 0.028                     | 0.221 ± 0.083                     | 0.266 ± 0.165    | 0.352 ± 0.104   | 0.571 |
| 20:3n-9      | 0.114 ± 0.015                     | 0.642 ± 0.481*                    | 1.556 ± 1.018    | 0.501 ± 0.380   | 0.256 |
| 20:3n-6      | 0.507 ± 0.107                     | 0.796 ± 0.178                     | 0.909 ± 0.368    | 1.109 ± 0.300   | 0.382 |
| 20:4n-6      | 0.856 ± 0.246                     | 1.539 ± 0.366                     | 0.520 ± 0.110    | 0.602 ± 0.224   | 0.200 |
| 20:3n-3      | 0.044 ± 0.010                     | 0.068 ± 0.025                     | 0.058 ± 0.021    | 0.046 ± 0.010   | 0.910 |
| 20:4n-3      | 0.056 ± 0.010                     | 0.069 ± 0.025                     | 0.082 ± 0.050    | 0.058 ± 0.030   | 0.993 |
| 20:5n-3      | 0.386 ± 0.084                     | 0.427 ± 0.076                     | 0.501 ± 0.216    | 0.920 ± 0.332   | 0.361 |
| 22:0         | 0.263 ± 0.031                     | 0.157 ± 0.029*                    | 0.115 ± 0.017    | 0.160 ± 0.117   | 0.097 |
| 22:1n-9      | 0.103 ± 0.026                     | 0.233 ± 0.089                     | 0.029 ± 0.011    | 0.150 ± 0.041*  | 0.100 |
| 22:1n-7      | 0.048 ± 0.006                     | 0.056 ± 0.025                     | 0.017 ± 0.003    | 0.081 ± 0.029*  | 0.055 |
| 22:2n-9      | 0.044 ± 0.010                     | 0.049 ± 0.018                     | 0.041 ± 0.030    | 0.076 ± 0.024   | 0.609 |
| 22:3n-9      | 1.130 ± 0.218                     | 1.278 ± 0.432                     | 0.824 ± 0.265    | 3.926 ± 2.521   | 0.629 |
| 23:0         | 0.060 ± 0.008                     | 0.378 ± 0.231                     | 0.038 ± 0.011    | 0.145 ± 0.046*  | 0.143 |
| 22:4n-6      | 0.093 ± 0.025                     | 0.487 ± 0.388                     | 0.114 ± 0.076    | 0.263 ± 0.120   | 0.390 |
| 22:5n-6      | 0.160 ± 0.024                     | 0.132 ± 0.024                     | 0.380 ± 0.167    | 0.344 ± 0.073   | 0.147 |
| 22:4n-3      | 0.030 ± 0.005                     | 0.032 ± 0.016                     | 0.039 ± 0.018    | 0.076 ± 0.035   | 0.158 |
| 22:5n-3      | 1.000 ± 0.217                     | 1.272 ± 0.306                     | 0.905 ± 0.347    | 1.610 ± 0.719   | 0.810 |
| 24:0         | 0.116 ± 0.015                     | 0.130 ± 0.030                     | 0.131 ± 0.059    | 0.166 ± 0.017   | 0.656 |
| 22:6n-3      | 1.149 ± 0.304                     | 2.166 ± 0.470                     | 5.424 ± 3.951    | 4.081 ± 1.244   | 0.145 |
| 24:1n-9      | 0.152 ± 0.033                     | 0.137 ± 0.022                     | 0.099 ± 0.039    | 0.198 ± 0.024   | 0.261 |
| 24:1n-7      | 0.046 ± 0.016                     | 0.030 ± 0.006                     | 0.045 ± 0.023    | 0.054 ± 0.018   | 0.762 |
| SUM SFA      | 54.948 ± 1.528                    | 51.064 ± 3.140                    | 51.965 ± 3.876   | 54.159 ± 2.104  | 0.733 |
| SUM MUFA     | 33.055 ± 0.417                    | 32.583 ± 1.444                    | 30.207 ± 4.497   | 24.040 ± 3.067  | 0.102 |
| SUM PUFA     | 8.816 ± 1.292                     | 13.769 ± 2.361                    | 14.418 ± 5.457   | 16.786 ± 2.990  | 0.234 |
| SUM n-6 PUFA | 4.498 ± 0.694                     | 6.964 ± 1.414                     | 3.800 ± 0.479    | 4.642 ± 0.849   | 0.642 |
| SUM n-3 PUFA | 2.884 ± 0.438                     | 4.435 ± 0.864                     | 7.740 ± 4.535    | 7.488 ± 1.358   | 0.129 |
| UFA/SFA      | 0.772 ± 0.054                     | 0.949 ± 0.112                     | 0.875 ± 0.113    | 0.757 ± 0.036   | 0.649 |
| n-3/n-6 PUFA | 0.658 ± 0.063                     | 0.660 ± 0.082                     | 1.815 ± 0.909    | 1.670 ± 0.357   | 0.054 |
| SUM DMA      | 3.181 ± 0.307                     | 2.584 ± 0.528                     | 3.410 ± 1.601    | 5.015 ± 1.797   | 0.423 |

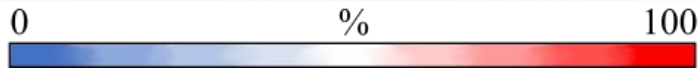

**Figure S7.** Fatty acid (FA) profiles of adipose tissue (AT) extracellular vesicles (EVs) and culture media. Visceral (VAT) and subcutaneous adipose tissue (SAT) EVs, as well as *ex vivo* culture media were determined from total lipids with gas chromatography–mass spectrometry. Results are presented as mol-%, mean ± SEM. FAs are listed in the order of increasing chromatographic retention time. DMA = plasmalogen alkenyl chain-derived dimethyl acetal derivative, SFA = saturated fatty acid, MUFA = monounsaturated fatty acid, PUFA = polyunsaturated fatty acid, unsaturated fatty acid (UFA) = MUFA + PUFA. Means with no common letter are significantly different from each other within a row (Kruskal–Wallis ANOVA). \*  $p \leq 0.05$  Mann–Whitney U test vs. VAT. Results of FA profiles were analyzed from 3 EV samples, from which each corresponded to a pooled EV sample from 2 different patients. Media samples were obtained from 2 patient’s AT *ex vivo* cultures.

## Supplementary methods

### **Immunofluorescent and immunohistochemical staining of adipose tissue (AT) for caspase-9**

AT samples were fixed in 10% buffered formalin solution and embedded in paraffin. For caspase-9 immunohistochemical staining, 5 µm thick sections were deparaffinized, and antigen retrieval in 10 mM citrate buffer (pH 6.0) in a pressure cooker for 10 min was performed. Endogenous peroxidase activity was blocked with 1% H<sub>2</sub>O<sub>2</sub> for 5 min, and samples were washed with H<sub>2</sub>O 2 × 3 min and PBS 2 × 5 min. For blocking non-specific antibody binding, sections were incubated with 1% bovine serum albumin (BSA) PBS for 30 min. For primary antibody binding, sections were incubated with anti-pro caspase-9 phospho-S196 antibody (ab135544, Abcam, Cambridge, UK) 1:100, 1% BSA PBS dilution at +4°C for o/n. Samples were washed with PBS 3 × 10 min and incubated with the secondary antibody, biotinylated anti-rabbit IgG (BA-1000, Vector Laboratories, Newark, CA, USA) 1:150 in 1% BSA PBS at RT for 1 h. Caspase-9 antibody was visualized with Vectastain Elite<sup>®</sup> ABC kit (PK-6101, Vector Laboratories) using 3,3'-diaminobenzidine to stain in brown, and Mayer's hematoxylin to the detection of nuclei in blue. Samples were imaged with Leica Thunder imager 3D Tissue Slide scanner with 10× dry objective (Leica Microsystems, Wetzlar, Germany).

For immunofluorescent staining, the sections were deparaffinized, and autofluorescence was removed by 50 mM glycine in H<sub>2</sub>O for 40 min. For blocking non-specific antibody binding, sections were incubated with 1% BSA PBS for 30 min at +37°C. Primary antibody staining was performed as above. After 3 × 5 min phosphate buffer (PB) washes, secondary antibody staining with Texas Red anti-rabbit IgG (TI-1000, Vector Laboratories) dilution 1:200 in PB at RT for 1 h was performed. After 3 × 5 min PB washes, nuclei were stained with 1 µg/ml 4',6-diamidino-2-phenylindole (DAPI, D8417, Sigma-Aldrich, St. Louis, MO, USA). Sections were then mounted in Vectashield (H-1000, Vector Laboratories), and imaged with 40× NA 1.3 objective on a Zeiss Axio Observer inverted microscope equipped with a Zeiss LSM 800 confocal module (Carl Zeiss Microimaging GmbH, Jena, Germany).

### **Propidium iodide (PI) staining of Simpson Golabi Behmel Syndrome (SGBS) cells for confocal microscopy**

SGBS cells were plated and differentiated on Ibidi chamber slides (Ibidi GmbH, Martinsried, Germany), and then treated with TNFα or PA for 24h. To demonstrate cell viability, live SGBS cells were first stained with NucBlue<sup>®</sup> Live Cell Stain ReadyProbes<sup>™</sup> reagent (R37605, Life Technologies, Eugene, OR, USA) at RT for 5 min. Cells were then stained with 60 µM PI (SC-3541, Santa Cruz Biotechnology, Santa Cruz, CA, USA) at +37°C for 5 min and washed with PBS. Cells were visualized with 40× NA 1.3 objective on a Zeiss Axio Observer inverted microscope equipped with a Zeiss LSM 800 confocal module. PI-positive cells were manually counted from confocal images, and the data were expressed as % PI-positive cells from counted cells.
